# Supplementary material for: Proteomic study on gender differences in aging kidney of mice
Source: PubMed Central journal article supplement (PMC2673210; doi:10.1186/1477-5956-7-16), 2009-04-09
Supplement: 1477-5956-7-16-S1.pdf [file 1477-5956-7-16-S1.pdf]

A

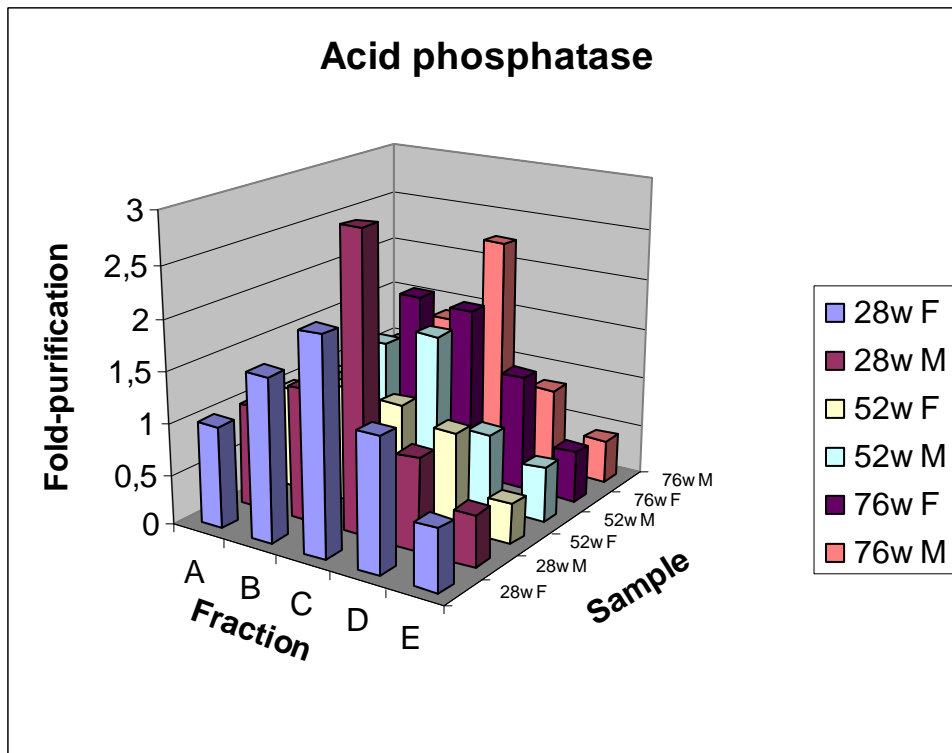

B

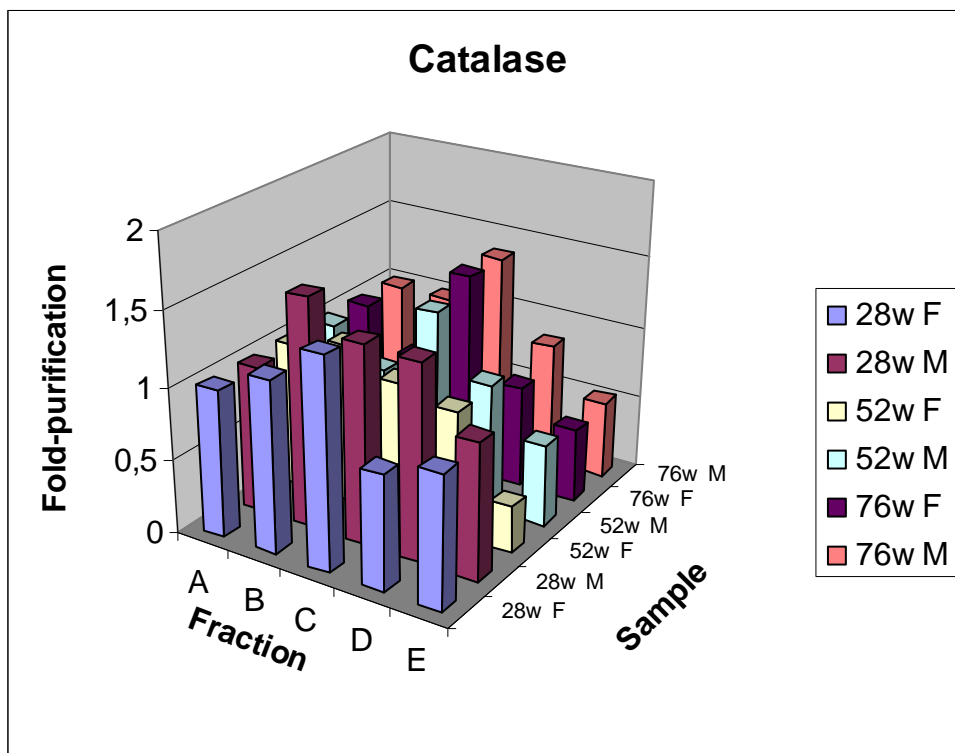

C

|   | 28w F | 28w M | 52w F | 52w M | 76w F | 76w M |
|---|-------|-------|-------|-------|-------|-------|
| A | 1     | 1     | 1     | 1     | 1     | 1     |
| B | 1.6   | 1.3   | 1.14  | 1.43  | 1.75  | 1.37  |
| C | 2.1   | 2.9   | 1.1   | 1.6   | 1.7   | 2.25  |
| D | 1.3   | 0.9   | 0.95  | 0.74  | 1.14  | 0.83  |
| E | 0.6   | 0.5   | 0.4   | 0.54  | 0.5   | 0.42  |

D

|   | 28w F | 28w M | 52w F | 52w M | 76w F | 76w M |
|---|-------|-------|-------|-------|-------|-------|
| A | 1     | 1     | 1     | 1     | 1     | 1     |
| B | 1.17  | 1.56  | 1.1   | 0.78  | 0.72  | 1     |
| C | 1.43  | 1.35  | 0.94  | 1.27  | 1.38  | 1.37  |
| D | 0.78  | 1.33  | 0.85  | 0.87  | 0.69  | 0.84  |
| E | 0.9   | 0.93  | 0.32  | 0.56  | 0.5   | 0.53  |
