# Supplementary material for: Proteomic study on gender differences in aging kidney of mice
Source: PubMed Central journal article supplement (PMC2673210; doi:10.1186/1477-5956-7-16), 2009-04-09

Additional file 2

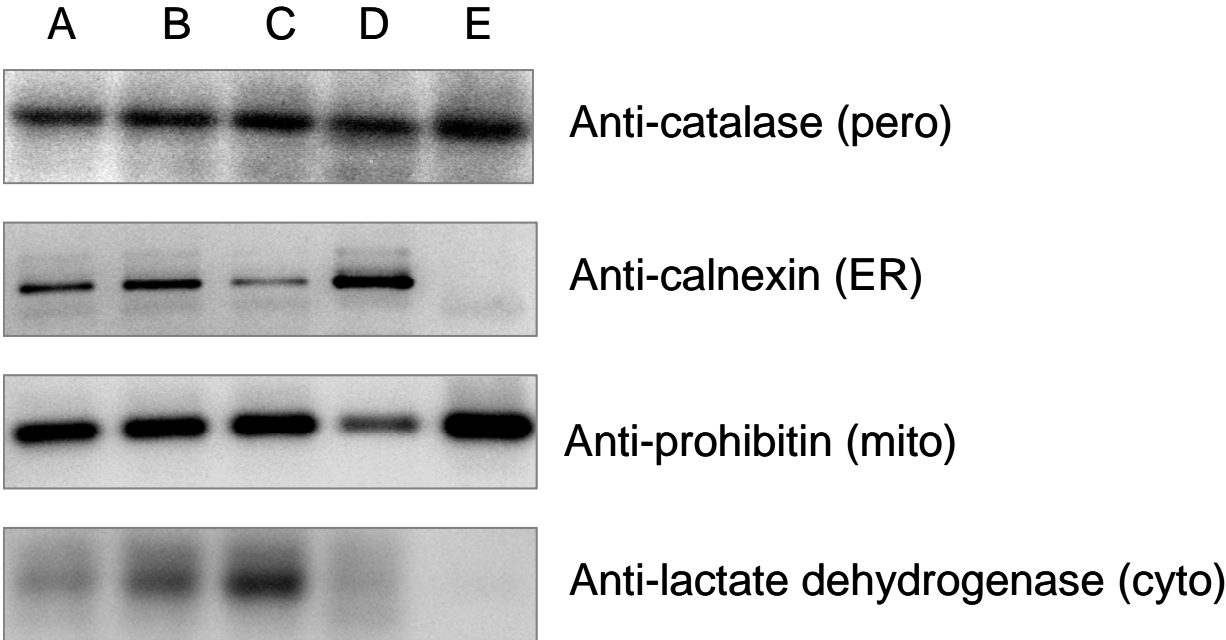

Supplement: 1477-5956-7-16-S2.pdf [file 1477-5956-7-16-S2.pdf]
