# Supplementary material for: Proteomic study on gender differences in aging kidney of mice
Source: PubMed Central journal article supplement (PMC2673210; doi:10.1186/1477-5956-7-16), 2009-04-09

Additional file 3

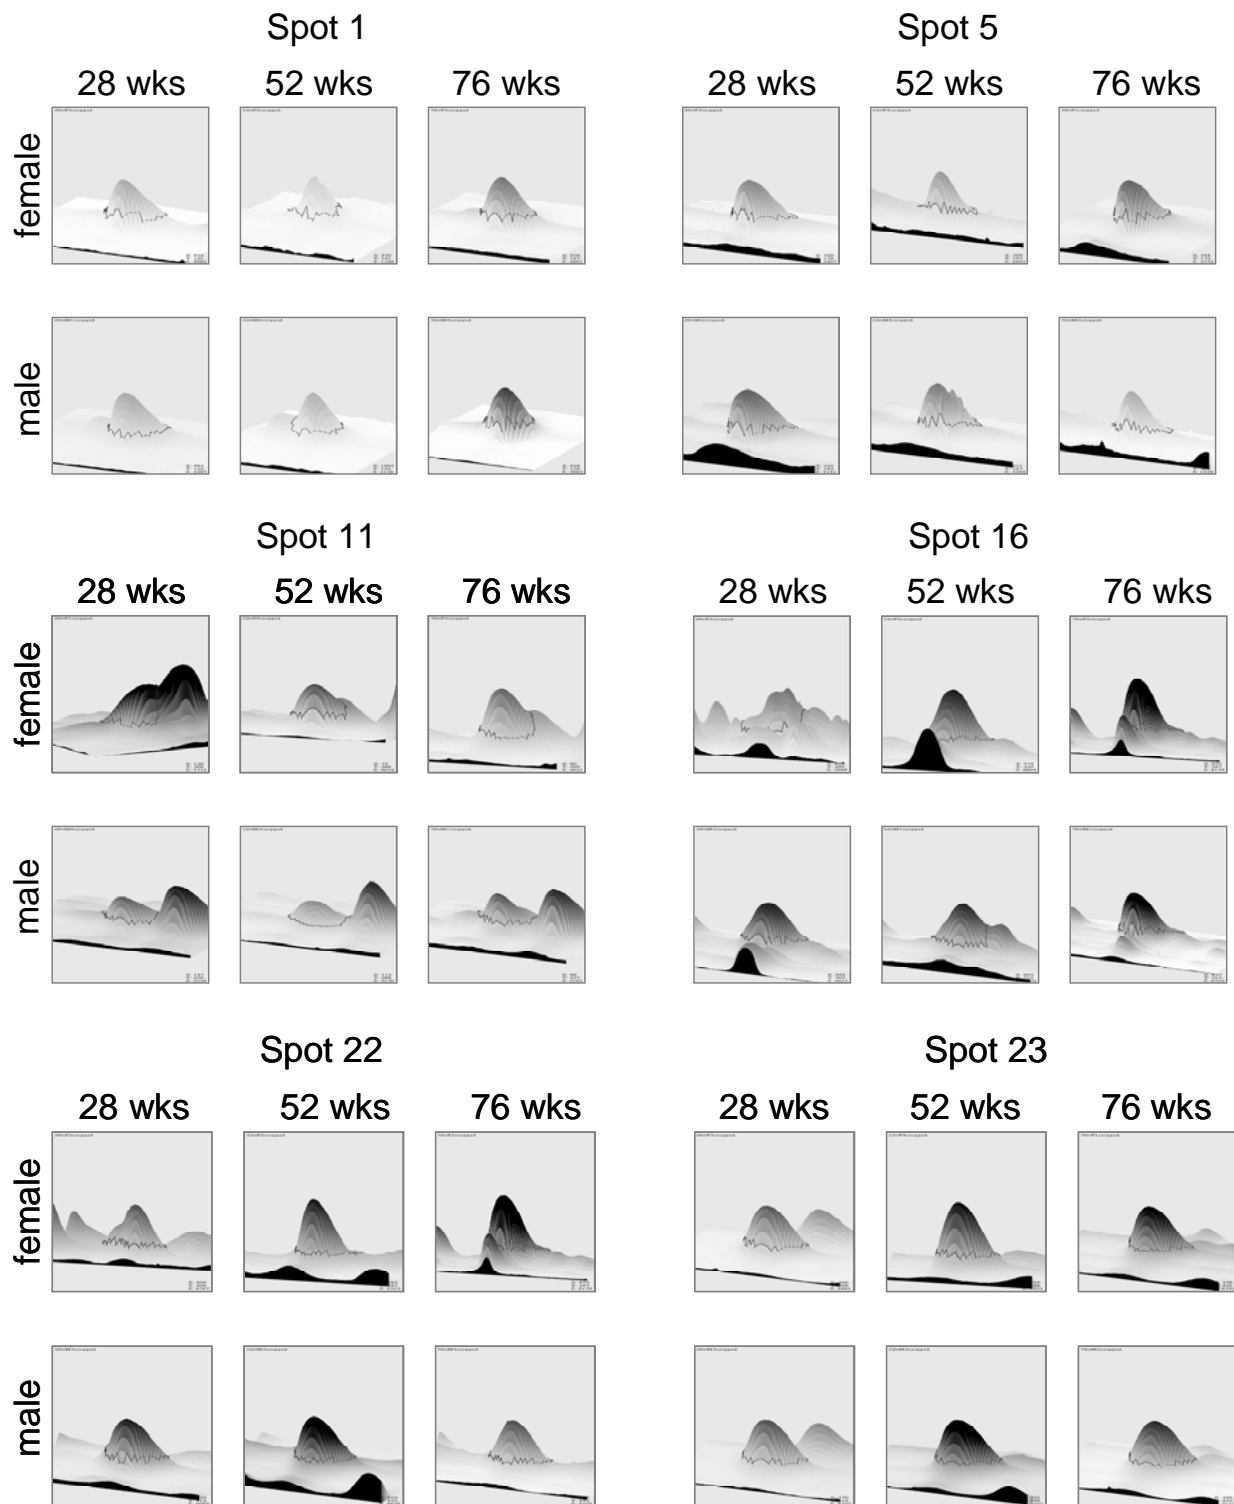

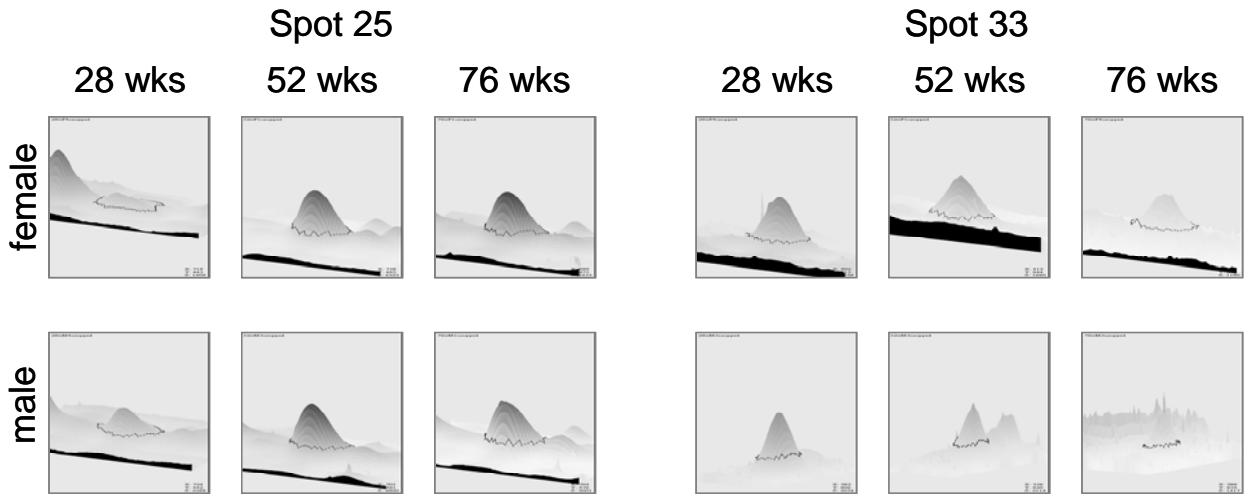

Supplement: 1477-5956-7-16-S3.pdf [file 1477-5956-7-16-S3.pdf]
