# Supplementary material for: Proteomic study on gender differences in aging kidney of mice
Source: PubMed Central journal article supplement (PMC2673210; doi:10.1186/1477-5956-7-16), 2009-04-09
Supplement: 1477-5956-7-16-S4.pdf [file 1477-5956-7-16-S4.pdf]

Additional file 4

A

| Spot no | 28 weeks |          | 52 weeks |          | 76 weeks |          |
|---------|----------|----------|----------|----------|----------|----------|
|         | Mean     | St. Dev. | Mean     | St. Dev. | Mean     | St. Dev. |
| 1       | 0.249    | 0.053    | 0.219    | 0.050    | 0.383    | 0.027    |
| 2       | 1.156    | 0.188    | 0.685    | 0.185    | 0.619    | 0.210    |
| 3       | 0.260    | 0.134    | 0.611    | 0.193    | 0.362    | 0.122    |
| 4       | 2.179    | 0.600    | 3.159    | 0.473    | 1.512    | 0.373    |
| 5       | 0.579    | 0.120    | 0.313    | 0.037    | 0.595    | 0.022    |
| 6       | 0.338    | 0.129    | 0.171    | 0.029    | 0.680    | 0.107    |
| 7       | 0.309    | 0.042    | 0.358    | 0.074    | 0.880    | 0.156    |
| 8       | 0.231    | 0.038    | 0.327    | 0.045    | 0.141    | 0.045    |
| 9       | 0.478    | 0.077    | 0.663    | 0.152    | 0.810    | 0.104    |
| 10      | 1.903    | 0.261    | 1.923    | 0.215    | 1.251    | 0.298    |
| 11      | 1.367    | 0.139    | 1.017    | 0.503    | 0.639    | 0.252    |
| 12      | 0.306    | 0.114    | 0.136    | 0.037    | 0.994    | 0.110    |
| 13      | 0.550    | 0.121    | 0.378    | 0.174    | 0.208    | 0.023    |
| 14      | 0.626    | 0.078    | 0.497    | 0.150    | 0.282    | 0.045    |
| 15      | 0.143    | 0.050    | 0.192    | 0.062    | 0.406    | 0.083    |
| 16      | 1.546    | 0.324    | 2.224    | 0.272    | 2.482    | 0.196    |
| 17      | 2.234    | 0.701    | 1.576    | 0.143    | 1.175    | 0.320    |
| 18      | 0.612    | 0.156    | 0.875    | 0.223    | 1.125    | 0.190    |
| 19      | 0.181    | 0.039    | 0.121    | 0.015    | 0.111    | 0.018    |
| 20      | 0.056    | 0.017    | 0.077    | 0.025    | 0.117    | 0.021    |
| 21      | 0.323    | 0.047    | 0.254    | 0.015    | 0.139    | 0.013    |
| 22      | 1.097    | 0.147    | 1.391    | 0.177    | 1.610    | 0.151    |
| 23      | 0.699    | 0.193    | 1.036    | 0.130    | 1.236    | 0.108    |
| 24      | 0.372    | 0.023    | 0.309    | 0.060    | 0.578    | 0.086    |
| 25      | 0.357    | 0.115    | 0.695    | 0.080    | 0.758    | 0.068    |
| 26      | 0.302    | 0.099    | 0.275    | 0.107    | 0.530    | 0.091    |
| 27      | 0.239    | 0.027    | 0.201    | 0.027    | 0.110    | 0.011    |
| 28      | 0.241    | 0.076    | 0.352    | 0.087    | 0.415    | 0.080    |
| 29      | 0.160    | 0.039    | 0.168    | 0.025    | 0.229    | 0.034    |
| 30      | 0.100    | 0.041    | 0.139    | 0.024    | 0.206    | 0.052    |
| 31      | 0.132    | 0.013    | 0.178    | 0.024    | 0.146    | 0.017    |
| 32      | 0.219    | 0.056    | 0.433    | 0.064    | 0.544    | 0.056    |
| 33      | 0.287    | 0.041    | 0.324    | 0.031    | 0.193    | 0.071    |

B

| Spot no | 28 weeks |          | 52 weeks |          | 76 weeks |          |
|---------|----------|----------|----------|----------|----------|----------|
|         | Mean     | St. Dev. | Mean     | St. Dev. | Mean     | St. Dev. |
| 1       | 0.309    | 0.069    | 0.228    | 0.047    | 0.599    | 0.209    |
| 5       | 0.739    | 0.092    | 0.683    | 0.107    | 0.388    | 0.044    |
| 11      | 0.968    | 0.268    | 0.671    | 0.078    | 1.148    | 0.168    |
| 16      | 1.617    | 0.283    | 1.605    | 0.482    | 2.634    | 0.279    |
| 22      | 1.393    | 0.214    | 1.849    | 0.330    | 1.316    | 0.149    |
| 23      | 0.917    | 0.214    | 1.422    | 0.123    | 1.199    | 0.249    |
| 25      | 0.363    | 0.063    | 0.689    | 0.116    | 0.554    | 0.156    |
| 33      | 0.345    | 0.059    | 0.246    | 0.031    | 0.187    | 0.035    |
| 34      | 0.359    | 0.170    | 0.288    | 0.055    | 0.789    | 0.310    |
| 35      | 0.583    | 0.179    | 0.231    | 0.159    | 0.384    | 0.124    |
| 36      | 0.055    | 0.011    | 0.082    | 0.035    | 0.143    | 0.028    |
| 37      | 0.112    | 0.039    | 0.133    | 0.052    | 0.247    | 0.085    |
| 38      | 0.517    | 0.070    | 0.330    | 0.062    | 0.435    | 0.038    |
| 39      | 0.243    | 0.042    | 0.129    | 0.030    | 0.169    | 0.050    |
| 40      | 0.358    | 0.119    | 0.303    | 0.071    | 0.131    | 0.051    |
| 41      | 0.392    | 0.069    | 0.202    | 0.049    | 0.222    | 0.117    |
| 42      | 0.081    | 0.024    | 0.091    | 0.029    | 0.132    | 0.016    |
| 43      | 1.340    | 0.459    | 0.950    | 0.175    | 1.614    | 0.267    |
| 44      | 0.116    | 0.011    | 0.121    | 0.025    | 0.174    | 0.027    |
| 45      | 0.096    | 0.009    | 0.108    | 0.004    | 0.124    | 0.012    |
| 46      | 0.616    | 0.175    | 0.861    | 0.042    | 0.943    | 0.121    |
| 47      | 0.349    | 0.069    | 0.327    | 0.052    | 0.214    | 0.059    |
