# Supplementary material for: Proteomic study on gender differences in aging kidney of mice
Source: PubMed Central journal article supplement (PMC2673210; doi:10.1186/1477-5956-7-16), 2009-04-09
Supplement: 1477-5956-7-16-S5.pdf [file 1477-5956-7-16-S5.pdf]

Additional file 5

A

| Ref Nr | Protein name                        | 52/28 wks | 76/28 wks | Function                    | Localization | NCBI nr      | Coverage, % | No of matched peaks | Score | p        | Mr theor | Mr obs | pI      |
|--------|-------------------------------------|-----------|-----------|-----------------------------|--------------|--------------|-------------|---------------------|-------|----------|----------|--------|---------|
| 1      | transferrin                         | -1,14     | 1,53      | ion transporter             | extracell    | gi 20330802  | 47          | 30/69               | 241   | 9,00E-20 | 76724    | 76700  | 7,2     |
| 2      | 78 kDa glucose-regulated protein    | -1,69     | -1,78     | chaperone                   | ER           | gi 2506545   | 48          | 27/68               | 209   | 1,40E-16 | 72422    | 72400  | 5,2     |
| 3      | heat shock protein 9A               | 2,35      | 1,39      | chaperone                   | mito         | gi 162461907 | 44          | 26/67               | 184   | 4,50E-14 | 73461    | 71500  | 5,8-5,9 |
| 4      | albumin                             | 1,45      | -1,44     | transporter                 | ER           | gi 163310765 | 38          | 20/46               | 176   | 2,80E-13 | 68693    | 65700  | 6       |
| 5      | heat shock protein 9A               | -1,85     | 1,03      | chaperone                   | mito         | gi 162461907 | 27          | 16/75               | 72    | 0,0078   | 73461    | 66600  | 6,3     |
| 6      | Hspd1 protein                       | -1,98     | 2         | chaperone                   | mito         | gi 76779273  | 40          | 18/82               | 106   | 2,80E-06 | 60955    | 61200  | 5,7     |
| 7      | leucine aminopeptidase              | 1,16      | 2,85      | exopeptidase                | cyt          | gi 124028616 | 57          | 32/57               | 268   | 1,80E-22 | 56141    | 57100  | 7,4     |
| 8      | glutamate dehydrogenase 1           | 1,42      | -1,64     | glutamate catabolism        | mito         | gi 148692928 | 43          | 21/80               | 111   | 1,10E-06 | 54219    | 54700  | 7,6     |
| 9      | aldehyde dehydrogenase              | 1,39      | 1,7       | aldehydes' oxidation        | mito         | gi 6753036   | 38          | 17/55               | 138   | 1,80E-09 | 56538    | 53200  | 6,9     |
| 10     | ATP syntase, beta subunit           | 1,01      | -1,52     | ATP synthesis/hydrolysis    | mito         | gi 89574015  | 62          | 23/78               | 153   | 5,70E-11 | 56300    | 52500  | 5,2     |
| 11     | ATP synthase, F1 complex            | -1,34     | -2,14     | ATP synthesis/hydrolysis    | mito         | gi 31980648  | 39          | 23/103              | 90    | 0,00011  | 56300    | 52500  | 5,1     |
| 12     | D-lactate dehydrogenase             | -2,25     | 3,25      | FAD binding domain          | mito         | gi 34328379  | 51          | 21/128              | 89    | 0,00015  | 51848    | 52500  | 6,4     |
| 15     | ornithine aminotransferase          | 1,34      | 2,84      | amino acid metabolism       | mito         | gi 8393866   | 41          | 16/59               | 122   | 3,10E-06 | 48355    | 47500  | 6,3     |
| 16     | isocitrate dehydrogenase 1          | 1,44      | 1,6       | carbohydrate metabolism     | cyt          | gi 74144459  | 67          | 33/275              | 94    | 5,10E-05 | 46674    | 45000  | 7,2     |
| 17     | gamma-actin                         | -3,19     | -1,9      | cytoskeleton                | cyt          | gi 809561    | 52          | 17/52               | 108   | 1,80E-06 | 41793    | 45000  | 5,5     |
| 18     | isovaleryl coenzyme A dehydrogenase | 1,43      | 1,84      | β-oxidation                 | mito         | gi 9789985   | 32          | 13/52               | 95    | 3,50E-05 | 46325    | 45000  | 7       |
| 20     | isocitrate dehydrogenase 3          | 1,38      | 2,1       | carbohydrate metabolism     | mito         | gi 18250284  | 39          | 33/275              | 87    | 0,00024  | 39693    | 39800  | 5,8     |
| 21     | fructose biphosphatase 1            | -1,27     | -2,33     | carbohydrate metabolism     | cyt          | gi 9506589   | 61          | 19/37               | 192   | 7,10E-15 | 36912    | 38500  | 6,4-6,5 |
| 22     | hypothetical protein LOC70984       | 1,27      | 1,47      | unknown (hydrolase?)        | cyt          | gi 19526926  | 45          | 14/58               | 75    | 0,0033   | 34996    | 33000  | 6,4     |
| 23     | hypothetical protein LOC70984       | 1,48      | 1,77      | unknown (hydrolase?)        | cyt          | gi 19526926  | 22          | 8/23                | 105   | 3,60E-06 | 34996    | 32500  | 6,3     |
| 24     | lactamase, beta 2                   | -1,21     | 1,55      | glyoxalytic activity        | mito         | gi 21703764  | 34          | 9/37                | 77    | 0,0025   | 32754    | 29100  | 6,5     |
| 25     | 3-hydroxyisobutyrate dehydrogenase  | 1,95      | 2,12      | oxidative carboxylase       | mito         | gi 21704140  | 34          | 12/54               | 70    | 0,012    | 35440    | 28300  | 6,6     |
| 26     | GRIN1                               | -1,1      | 1,75      | neurite outgrowth induction | cyt          | gi 5901688   | 30          | 25/60               | 72    | 0,0078   | 95496    | 26000  | 5,3     |
| 27     | phosphoglycerate mutase 1           | -1,19     | -2,18     | transport and metabolism    | cyt/lyso     | gi 114326546 | 56          | 12/72               | 80    | 0,0012   | 28832    | 26000  | 7,9     |

B

| Ref Nr | Protein name                       | 52/28 wks | 76/28 wks | Function                         | Localization | NCBI nr      | Coverage, % | No of matched peaks | Score | p        | Mr theor | Mr obs | pI      |
|--------|------------------------------------|-----------|-----------|----------------------------------|--------------|--------------|-------------|---------------------|-------|----------|----------|--------|---------|
| 1      | transferrin                        | -1,36     | 1,94      | iron transporter                 | extracell    | gi 20330802  | 42          | 26/74               | 194   | 4,50E-15 | 76724    | 76700  | 7,2-7,3 |
| 34     | transferrin                        | -1,25     | 2,2       | iron transporter                 | extracell    | gi 20330802  | 24          | 14/36               | 111   | 9,00E-07 | 76724    | 76700  | 7,4     |
| 5      | heat shock protein 9A              | -1,1      | -1,9      | chaperone                        | mito         | gi 162461907 | 67          | 45/204              | 175   | 3,60E-13 | 73461    | 66600  | 6,3     |
| 35     | catalase                           | -2,52     | -1,52     | antioxidant                      | pero         | gi 115704    | 45          | 23/59               | 189   | 1,40E-14 | 59765    | 57100  | 7,6     |
| 36     | aldehyde dehydrogenase 6, A1       | 1,5       | 2,61      | aldehydes' oxidation             | mito         | gi 19527258  | 35          | 14/76               | 83    | 0,00055  | 57916    | 54700  | 7,6     |
| 37     | glutathione synthetase             | 1,19      | 2,21      | glutathione biosynthesis         | cyt          | gi 6680117   | 37          | 18/56               | 154   | 4,50E-11 | 52247    | 54700  | 5,7-5,8 |
| 11     | ATP synthase, F1 complex           | -1,44     | 1,19      | ATP synthesis/hydrolysis         | mito         | gi 31980648  | 39          | 23/103              | 90    | 0,00011  | 56300    | 52500  | 5,2     |
| 16     | isocitrate dehydrogenase 1         | -1,01     | 1,63      | carbohydrate metabolism          | cyto         | gi 74144459  | 67          | 33/275              | 94    | 5,10E-05 | 46674    | 45000  | 7,2     |
| 39     | phosphotriesterase related         | -1,88     | -1,44     | organophosphates' detoxification | cyt/mito     | gi 6679525   | 50          | 15/98               | 100   | 1,20E-05 | 39218    | 41300  | 7       |
| 41     | aldo-keto reductase 1, A4          | -1,94     | -1,77     | oxidoreductase                   | cyt/mito     | gi 10946870  | 49          | 15/51               | 146   | 2,80E-10 | 36587    | 38500  | 7,7-7,8 |
| 22     | hypothetical protein LOC70984      | 1,33      | -1,1      | unknown (hydrolase?)             | cyt          | gi 19526926  | 22          | 8/23                | 75    | 0,0033   | 34996    | 33000  | 6,4     |
| 23     | hypothetical protein LOC70984      | 1,55      | 1,31      | unknown (hydrolase?)             | cyt          | gi 19526926  | 45          | 14/58               | 105   | 3,60E-06 | 34996    | 32500  | 6,3     |
| 25     | 3-hydroxyisobutyrate dehydrogenase | 1,9       | 1,51      | oxidative carboxylase            | mito         | gi 21704140  | 38          | 11/54               | 82    | 0,0007   | 35440    | 28300  | 6,7     |
| 46     | peroxiredoxin-1                    | 1,4       | 1,53      | thiol-specific antioxidant       | cyt          | gi 123230136 | 75          | 18/87               | 153   | 6,90E-11 | 18927    | 19300  | 6,6-6,7 |
